# Supplementary material
Source: PubMed Central journal article supplement (PMC4744917)
Supplement: CVI.00637-15_zcd999095312so1.pdf [file CVI.00637-15_zcd999095312so1.pdf]

## A. PPD

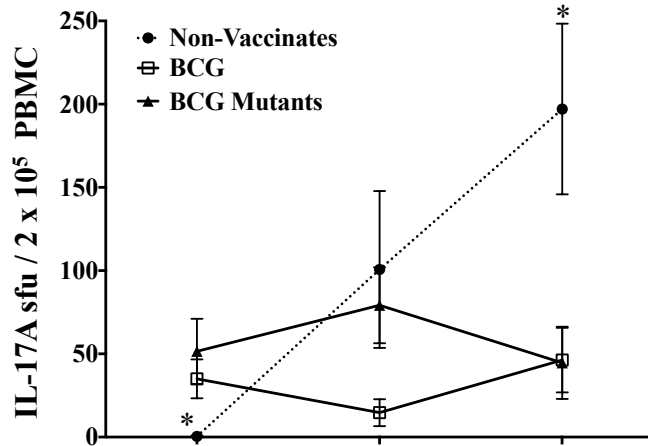

## B. Ag85A/TB10.4

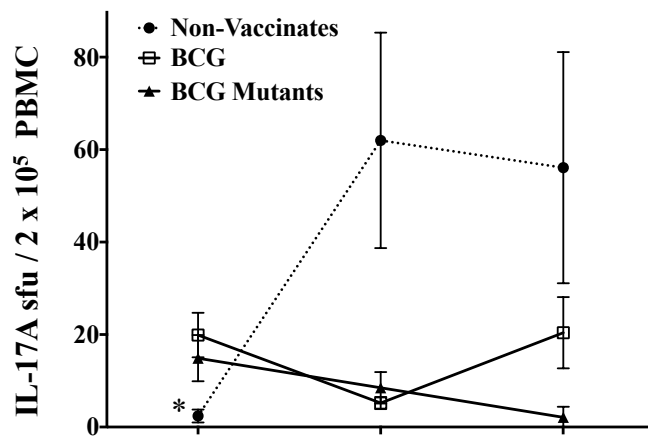

## C. rESAT-6:CFP10

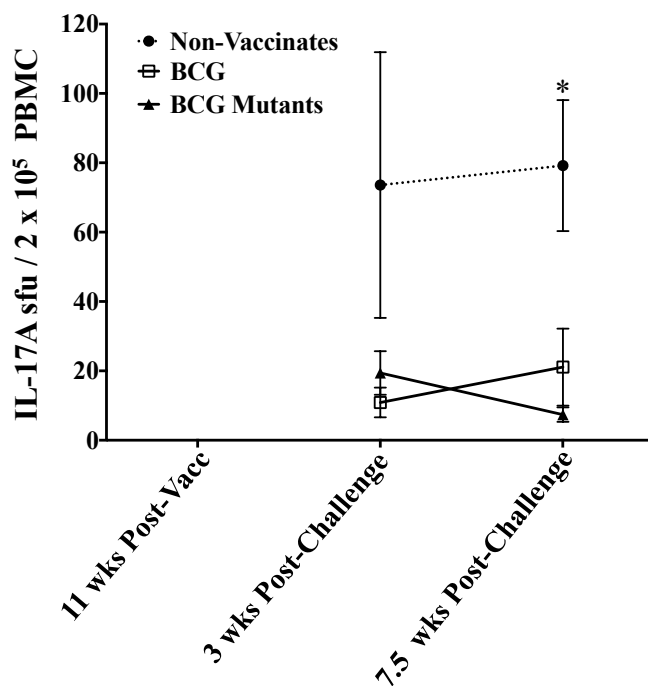

## Supplemental Figure S1. IL-17A responses (protein, ELISPOT) to vaccination and subsequent challenge with virulent *M. bovis*.

Treatment groups included: non-vaccinated animals (n = 10), BCG-vaccinated animals (n = 9), and BCG mutants (i.e., BCG  $\Delta fdr8$ , BCG  $\Delta leuCD \Delta pks16$ , BCG  $\Delta metA$ , and BCG  $\Delta mmaA4$ ) vaccinated animals (n = 10). Virulent *M. bovis* strain 10-7428 was administered by aerosol to all calves 3.5 months after vaccination and calves were euthanized 4.5 months after *M. bovis* challenge (Table 1). For IL-17A analysis, PBMC ( $2 \times 10^5$  PBMC/well) were stimulated with 5  $\mu$ g/ml *M. bovis* PPD (A), 2  $\mu$ g/ml rAg85A/TB10.4 (B), or 2  $\mu$ g/ml rESAT-6:CFP10 (C) for 18 h prior to spot development and counting.

Plates were developed, as described in the Materials and Methods. Results are expressed as spot-forming units (sfu) /  $2 \times 10^5$  cells (y-axis). Responses were measured 11 wks after vaccination and at 3 and 7.5 wks after *M. bovis* challenge (x-axis).

\* Differs ( $P < 0.05$ ) from BCG and BCG mutants at the respective time point.

### A. PPD

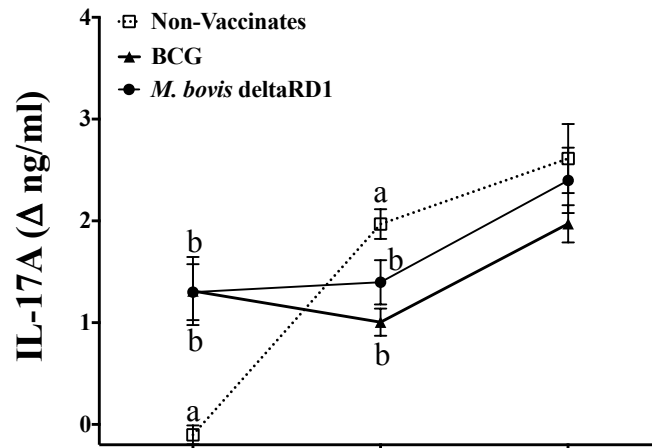

### B. rESAT-6:CFP10

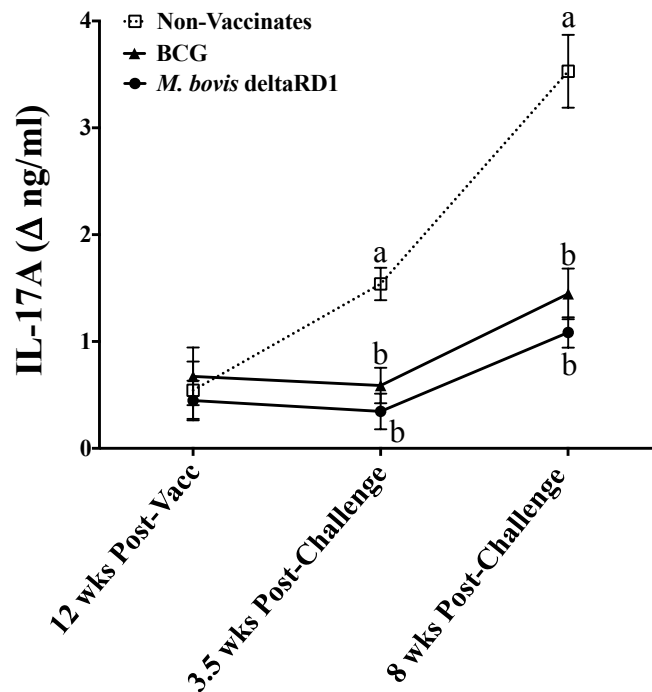

#### Supplemental Figure S2. Vaccine efficacy study 2007: IL-17A responses to vaccination and subsequent challenge with virulent *M. bovis*.

Treatment groups included: non-vaccinated animals (n = 10), BCG-vaccinated animals (n = 9), and *M. bovis*  $\Delta$ RD1-vaccinated animals (n = 10). Virulent *M. bovis* strain 95-1315 was administered by aerosol to all calves 3 months after vaccination and calves were euthanized 4.5 months after *M. bovis* challenge (Table 1). PBMC ( $2 \times 10^5$  PBMC/well) were stimulated with 1  $\mu$ g/ml *M. bovis* PPD (Lelystad, Prionics Ag) (A), 1  $\mu$ g/ml rESAT-6:CFP10 (B) or media alone at 39°C for 16 h and supernatants harvested for IL-17A analysis by ELISA (Bovine IL-17A ELISA VetSet, Kingfisher Biotech). Responses were measured 12 wks after vaccination and at 3.5 and 8 wks after *M. bovis* challenge (x-axis).

<sup>a-c</sup> Differing superscripts indicate that responses (mean  $\pm$  SEM) differ ( $P < 0.05$ ) within the given time point.

## A. PPD

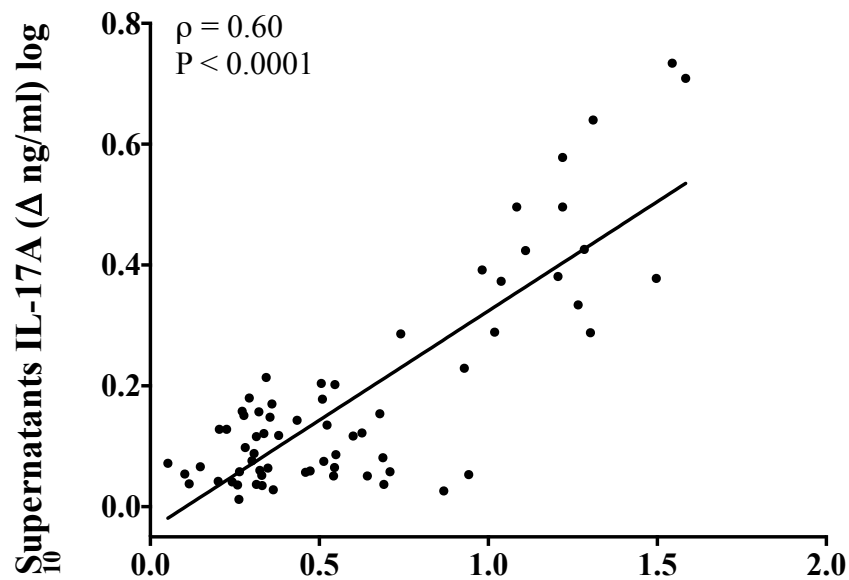

## B. rESAT-6:CFP10

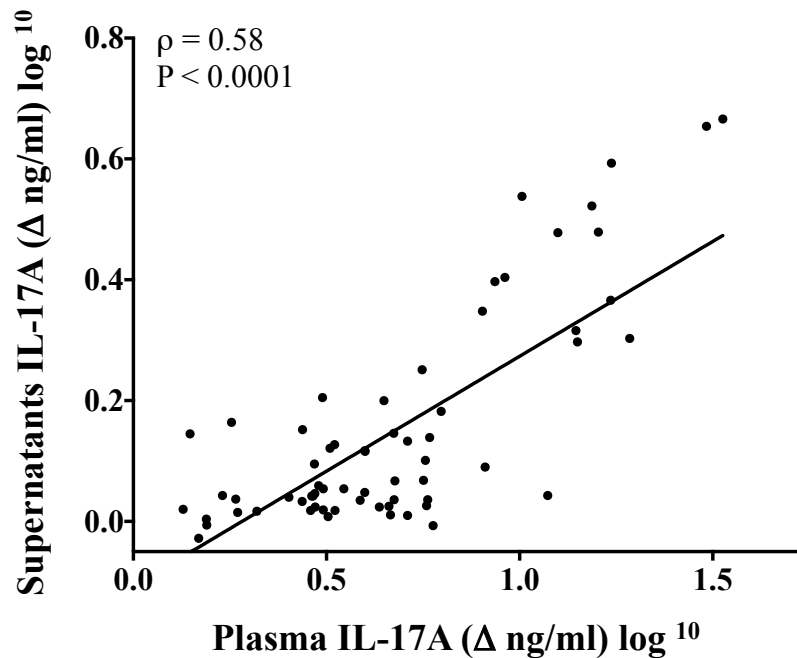

**Supplemental Figure S3. Correlation of IL-17A responses to *M. bovis* PPD (A) or rESAT-6:CFP10 (B) in whole blood versus PBMC cultures.** Treatment groups included: non-infected (n = 7), 95-1315-infected (n = 8) and 10-7428-infected (n = 8) calves with the experimental design described in Table 1. IL-17A concentrations in PBMC supernatants (y-axis) or stimulated plasma from whole blood (x-axis) were determined by ELISA (Bovine IL-17A ELISA VetSet, Kingfisher Biotech). Data represent  $\Delta$  ng/ml,  $\log^{10}$  (i.e., antigen stimulation minus media alone) for PBMC supernatants (y-axis) versus whole blood stimulated plasma(x-axis) for each individual animal ( $\bullet$ ) and each time point (n = 69). Prior to analysis and graphing, data were transformed for positive skewness with zero values using the formula: New X =  $\text{Log}^{10}(X + 1)$ .  $\rho$  = Spearman's rank correlation coefficient
